# Supplementary material for: Translating the Adaptation of Ethiopian Coffee Farmers to Higher Temperatures into Economic Costs and Price Premiums: A Community-Based Breakeven Cost Approach
Source: Research Square preprint supplement (doi:10.21203/rs.3.rs-6786282/v1), 2025-06-12
Supplement: Supplementary file 1 [file c08baf4f52dd904ca47ce827.docx]

**Translating the Adaptation of Ethiopian Coffee Farmers to Higher Temperatures into Economic Costs and Price Premiums:**

**A Community-Based Breakeven Cost Approach**

**Supplementary Information**

***Supplementary Note 1. Benchmark producer & shade composition***

Benchmark cost of coffee production comes from a detailed cost survey with producers from Chiapas, Mexico, with comparable characteristics and production systems to the farmers surveyed in Ethiopia. A major difference between coffee systems in Africa and Latin America is washed vs. dried processing. We controlled for that difference by excluding costs associated with washing in the baseline scenario and including extra costs reported by Ethiopian farmers. Hourly payments for own-account coffee workers were corrected by Ethiopian household final consumption expenditure purchasing power parity (PPP) conversion factor. PPP is a spatial price deflator and currency converter that controls for price level differences between countries, thereby allowing comparisons. PPP factors for 2020 and 2021 were estimated, assuming Ethiopia’s average PPP variation rate since 2000[1](https://www.zotero.org/google-docs/?LV0JlJ). Besides, we considered that one day of labor involves 8 hours of active labor.

**Supplementary Table 1. Benchmark producer. Baseline Vs. Ethiopian farmer**

|  | Baseline (n=50) | Ethiopia (n=202) |
| --- | --- | --- |
| Years in Business | 25 Years | > 15 years (54%) |
| Farm Size | 4.95 Hectares | 4.53 Hectares |
| Plant Density (Trees/Hectare) | 3.365 | 2953 |
| Productivity (Lbs/Ha) | 1,168 | 1,339 |
| Daily Wage (USD) | 5.11 | 5.22 |
| Years in Business | 25 Years | > 15 years (54%) |
| Main Coffee Varieties | Arabic | Arabic |
| Farming System | Organic | Organic |
| Processing System | Washed | Dried (78%) |

Farm size, plant density, and productivity refer to the average of the sample means at each stage of coffee production (young, mature, and old trees).We estimated the daily cost of labor taking as a reference the hourly earnings for own-account coffee farmers in Ethiopia estimated by the International Labour Organization. This is 0.21 per hour in 2020 USD[37](https://www.zotero.org/google-docs/?igxffC). Then, we adjusted by purchasing power parity (PPP) conversion factor to eliminate the differences in price levels.


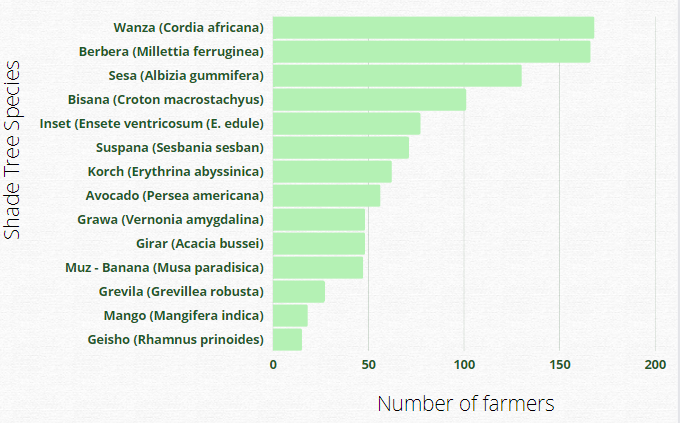


**Supplementary Figure 1. Shade tree species reported by farmers.** Cordia Africana has numerous other benefits besides improving coffee production. This tree species is known for its medicinal uses, can be used to attract bees, creating household tools, construction tools, a source for food, and much more[2](https://www.zotero.org/google-docs/?BbY3jl).

***Supplementary Note 2. Specific costs impact on labor, materials, and equipment***

During the establishment stage, germinator, and nursery activities showed higher needs for extra labor, mainly associated with seedling -irrigation and construction- and establishing shade tree seedlings (18 and 27 additional days of work, respectively). Higher temperatures also increased the labor needed for transporting and planting shade seedlings to the plot by 13 days, while 8.5 additional days were required for irrigation during vegetative growth (Supplementary Table 2). Similarly, during the maintenance stage, the labor needed for shade maintenance and coffee tree pruning duplicated from an average of 12 to 25 days and 13 to 30 days, respectively due to higher temperatures (Supplementary Table 3). The days needed for pest control and irrigation went from half or no days required on the baseline scenario to three and eight days, respectively, and even went up to 28 days needed for cutting down trees completely.

Baseline inputs and materials during land preparation, vegetative growth, and maintenance referred mainly to fertilizers and transportation costs (gas). Farmers in Ethiopia, however, reported additional materials costs related to sowing, weeding, irrigation, pest control, harvest, pruning, and shade management due to higher temperatures (Fig. 3d). These additional costs increased, by around 25%, material costs for land preparation and vegetative growth -mainly sowing, irrigation and weeding. Besides, during the maintenance stage, materials costs doubled. Shade management, pruning shade trees, and cutting down trees became around 40% of these new costs. During the establishment stage, the cost of seeds and materials for seedbed management was also duplicated due to higher temperatures, while nursery materials cost increased by 10% (Supplementary Table 2). Finally, general tools that include items like manual sprayers, shovels, hoes, wheelbarrows, limes, sprinklers, chainsaws, handsaws, pruning scissors, and ax, which are used mainly during establishment and weeding, increased by 24%. Other equipment used during harvest and shade management increased costs in 22%. Overall, the total fixed cost increased by 14%, from USD 487 to 555.

**Supplementary Table 2. Days and value of labor for Establishment**

| **Labor requirements during Establishment stage** | | | | |
| --- | --- | --- | --- | --- |
|  | **Regular**  **Days** | **Value (USD)** | **Extra days due to Higher temperatures** | **Value (USD)** |
| **Germinator Labor** |  |  |  |  |
| Seed Collection | 1.72 | 2.89 | 3.4 | 5.67 |
| Seed Selection | 1.52 | 2.55 |  |
| Shed Construction | 4.03 | 6.77 | 18.3 | 30.66 |
| Seedling Irrigation | 8.82 | 14.82 |  |
| Other | 0.88 | 1.48 |  |  |
|  | ***16.97*** | ***28.51*** | ***21.6*** |  |
| **Nursery Labor** |  |  |  |  |
| Nursery Construction | 9.61 | 16.14 | 11.4 | 19.11 |
| Nursery Soil Transport | 8.92 | 14.99 |  |
| Compost Mix for bags | 6.34 | 10.65 |  |
| Seedling bags filling | 14.78 | 24.83 |  |
| Seedling sowing | 5.45 | 9.16 |  |
| Nursery weeding | 16.98 | 28.53 |  |
| Irrigation | 24.53 | 41.21 |  |
| Organic Foliar spraying | 2.41 | 4.05 |  |
| Re-sowing seedlings | 1.44 | 2.42 |  |
| Other: Establishing shade tree seedlings | 0 | 0.00 | 27.625 | 46.41 |
|  | ***90.46*** | ***151.97*** |  |  |
| **Land Preparation Labor** |  |  |  |  |
| Field Cleaning | 18.78 | 31.55 |  |  |
| Old coffee trees cutting or other timber | 13.48 | 22.65 |  |  |
| Wood Collection | 3.5 | 5.88 |  |  |
| Wood Chopping | 6.12 | 10.28 |  |  |
| Coffee and Shade Layout | 10.78 | 18.11 |  |  |
| Hole Digging | 27.38 | 46.00 |  |  |
| Seedling transportation to the plot | 12.9 | 21.67 |  |  |
| Seedling Transplant and sowing | 23.34 | 39.21 | 13.125 | 22.05 |
| Shade Adjustment and shade- seedling transplanting | 13.32 | 22.38 | 12.5 | 21.00 |
| Compost Mixing | 4.66 | 7.83 |  |  |
| Other land preparation activities | 1.3 | 2.18 |  |  |
|  | **135.56** | **227.74** |  |  |
|  |  |  |  |  |
| **Vegetative Growth Labor** |  |  |  |  |
| Weeding | 47.43 | 79.68 | 13.7 | 22.97 |
| Organic Fertilization | 5.32 | 8.94 | 3.44 | 5.77 |
| Chemical Fertilization | 0 | 0.00 |  |  |
| Spraying | 6.2 | 10.42 |  |  |
| Other: Irrigation | 2.1 | 3.53 | 8.50 | 14.28 |
|  | **61.05** | **102.56** |  |  |

We considered that one day of labor involves 8 hours of active labor. Seedbed includes shed construction and seedling irrigation. Nursery includes: i) nursery installation (construction, soil transportation, bags preparation and filling and seedling sowing, and ii) nursery management (weeding, irrigation, foliar spraying, fertilization and re-sowing). Labor costs were reported in Ethiopian currency (birr) and for estimation purposes converted to USD using Ethiopian 2021 purchasing power parity rate (PPP). Values in the table are presented in 2021 USD at an average exchange rate of 51.15 Birr/

**Supplementary Table 3. Days and value of labor for Maintenance**

|  | **Young trees** | | | | **Mature trees** | | | | **Old trees** | | | |
| --- | --- | --- | --- | --- | --- | --- | --- | --- | --- | --- | --- | --- |
|  | **Baseline** | | **Additional days** | | **Baseline** | | **Additional days** | | **Baseline** | | **Additional days** | |
| **Maintenance Labor** | **Days** | **USD** | **HT** | **USD** | **Days** | **USD** | **HT** | **USD** | **Days** | **USD** | **HT** | **USD** |
| Weeding | 38.2 | 64.11 | 7.90 | 13.27 | 31.0 | 52.01 | 8.93 | 15.00 | 27.4 | 46.02 | 11.00 | 18.48 |
| Organic Fertilization | 5.8 | 9.68 | 3.61 | 6.06 | 5.6 | 9.39 | 3.72 | 6.25 | 5.8 | 9.73 | 3.74 | 6.28 |
| Spraying | 3.4 | 5.71 | 0.00 | 0.00 | 3.5 | 5.84 | 0.00 | 0.00 | 3.8 | 6.38 | 0.00 | 0.00 |
| Hedgerows Construction | 4.0 | 6.79 | 0.00 | 0.00 | 2.5 | 4.13 | 0.00 | 0.00 | 2.1 | 3.58 | 0.00 | 0.00 |
| Shade Maintenance (Management & Regulation) | 13.1 | 21.92 | 13.42 | 22.55 | 11.8 | 19.82 | 13.22 | 22.22 | 12.4 | 20.85 | 13.63 | 22.90 |
| Pest Control (Broca, etc.) | 0.3 | 0.47 | 2.97 | 4.99 | 0.4 | 0.60 | 2.97 | 4.99 | 0.4 | 0.60 | 2.31 | 3.88 |
| Pruning coffee trees | 16.7 | 28.11 | 14.80 | 24.86 | 11.7 | 19.62 | 21.20 | 35.61 | 12.4 | 20.88 | 15.75 | 26.46 |
| Other: Irrigation | 0.00 | 0.00 | 8.50 | 14.28 | 0.0 | 0.00 | 8.50 | 14.28 | 0.00 | 0.00 | 8.50 | 14.28 |
| Cutting down trees | 0.00 | 0.00 | 28.75 | 48.30 | 0.0 | 0.00 | 28.75 | 48.30 | 0.00 | 0.00 | 28.75 | 48.30 |
| **Harvesting Labor** | 9.4 | 15.80 | 1.71 | 2.87 | 28.6 | 47.99 | 5.20 | 8.73 | 44.5 | 74.76 | 8.09 | 13.60 |
| **Dry Processing Labor** | 12.1 | 20.40 | 0.00 | 0.00 | 22.1 | 37.11 | 0.00 | 0.00 | 23.5 | 39.41 | 0.00 | 0.00 |

HT: Higher temperatures. We considered that one day of labor involves 8 hours of active labor. The exchange rate for the period was 51.15 ETH/USD. To fill the gaps of labor, material, and equipment information in specific stages and activities in the Ethiopia survey (17%), we took the relative weight of each stage in the activities reported in Mexico (baseline). We applied those weights to the average days reported by farmers in Ethiopia. Besides, in those cases where it was possible to rank young, mature, and old stages based on days reported in the survey we kept that order. This correction controls for the longer tree lifespans found in Ethiopia compared to Mexico. The total value of labor during harvest is equivalent to the number of coffee cherry boxes collected times the payment per box. Boxes collected were also adjusted according to Ethiopia's productivity
